# Supplementary material for: Culture Change and Affectionate Communication in China and the United States: Evidence From Google Digitized Books 1960–2008
Source: PubMed Central journal article supplement (PMC6540734; doi:10.3389/fpsyg.2019.01110), 2019-05-22
Supplement: Data_Sheet_1.pdf [file Data_Sheet_1.pdf]

**Data Sheet 1. The frequency of using affection words and individualism words in Google digitized books 1960-2008.**

| <i>Language</i>    | <i>love you_frequency</i> | <i>like you_frequency</i> | <i>kiss_frequency</i> | <i>hug_frequency</i> | <i>individualism</i> |
|--------------------|---------------------------|---------------------------|-----------------------|----------------------|----------------------|
| Simplified-Chinese | 0.000000197450            | 0.000000343190            | 0.000000489931        | 0.000005253475       | 0.004070644598       |
|                    | 0.000000174753            | 0.000000274552            | 0.000000561732        | 0.000005192229       | 0.004032442452       |
|                    | 0.000000184326            | 0.000000240340            | 0.000000572031        | 0.000005083172       | 0.003919030121       |
|                    | 0.000000226596            | 0.000000214969            | 0.000000526165        | 0.000004894800       | 0.003478120608       |
|                    | 0.000000339326            | 0.000000147096            | 0.000000403993        | 0.000004418635       | 0.003010092936       |
|                    | 0.000000345250            | 0.000000102551            | 0.000000359449        | 0.000003733785       | 0.002407989396       |
|                    | 0.000000334849            | 0.000000075958            | 0.000000291067        | 0.000002967023       | 0.001535223065       |
|                    | 0.000000315568            | 0.000000018861            | 0.000000246205        | 0.000002477094       | 0.001084108666       |
|                    | 0.000000314735            | 0.000000018861            | 0.000000124928        | 0.000002504374       | 0.000549605298       |
|                    | 0.000000297534            | 0.000000008963            | 0.000000046959        | 0.000002289219       | 0.000369339593       |
|                    | 0.000000233533            | 0.000000024040            | 0.000000054377        | 0.000002376461       | 0.000527598018       |
|                    | 0.000000115376            | 0.000000031966            | 0.000000062303        | 0.000002363665       | 0.000604741976       |
|                    | 0.000000121977            | 0.000000056350            | 0.000000098879        | 0.000002855128       | 0.000584957316       |
|                    | 0.000000125148            | 0.000000071509            | 0.000000110249        | 0.000003252373       | 0.000709748627       |
|                    | 0.000000173637            | 0.000000098896            | 0.000000145105        | 0.000003583622       | 0.000677229227       |
|                    | 0.000000204757            | 0.000000140074            | 0.000000218637        | 0.000003559916       | 0.001081621019       |
|                    | 0.000000230155            | 0.000000184400            | 0.000000309542        | 0.000003975673       | 0.001262039068       |
|                    | 0.000000296899            | 0.000000226395            | 0.000000428818        | 0.000004279280       | 0.001568788628       |
|                    | 0.000000358906            | 0.000000278581            | 0.000000611298        | 0.000004899405       | 0.001988872819       |
|                    | 0.000000388711            | 0.000000311607            | 0.000000738871        | 0.000005245175       | 0.002450890689       |
|                    | 0.000000422784            | 0.000000345672            | 0.000000885550        | 0.000005584894       | 0.002860396482       |
|                    | 0.000000426199            | 0.000000376866            | 0.000001005785        | 0.000005934895       | 0.003290324292       |
|                    | 0.000000441882            | 0.000000404507            | 0.000001088405        | 0.000005981769       | 0.003303390261       |
|                    | 0.000000448524            | 0.000000419589            | 0.000001141266        | 0.000005913791       | 0.003253364076       |
|                    | 0.000000427273            | 0.000000396667            | 0.000001107054        | 0.000005685815       | 0.002955962503       |
|                    | 0.000000406462            | 0.000000385582            | 0.000001064042        | 0.000005466022       | 0.002834148166       |
|                    | 0.000000387441            | 0.000000388948            | 0.000001068147        | 0.000005247938       | 0.002635916583       |
|                    | 0.000000371737            | 0.000000397209            | 0.000001018701        | 0.000005081420       | 0.002475622674       |
|                    | 0.000000348084            | 0.000000375779            | 0.000000964013        | 0.000004758391       | 0.002265524658       |
|                    | 0.000000341232            | 0.000000354808            | 0.000000929737        | 0.000004569348       | 0.002112266019       |
|                    | 0.000000350846            | 0.000000364237            | 0.000000930162        | 0.000004491968       | 0.002054765601       |
|                    | 0.000000352669            | 0.000000386219            | 0.000000938556        | 0.000004395103       | 0.002130987083       |
|                    | 0.000000364889            | 0.000000405857            | 0.000000944562        | 0.000004379509       | 0.002216427909       |
|                    | 0.000000382526            | 0.000000434212            | 0.000000967586        | 0.000004484362       | 0.002388838317       |
|                    | 0.000000399522            | 0.000000448574            | 0.000001029661        | 0.000004655142       | 0.002558477482       |
|                    | 0.000000427088            | 0.000000481164            | 0.000001114951        | 0.000004933583       | 0.002810298300       |
|                    | 0.000000442726            | 0.000000504852            | 0.000001156897        | 0.000005107133       | 0.003003711604       |
|                    | 0.000000457619            | 0.000000514591            | 0.000001149449        | 0.000005109904       | 0.003067070860       |
|                    | 0.000000475028            | 0.000000535684            | 0.000001203905        | 0.000005338926       | 0.003186615742       |
|                    | 0.000000496003            | 0.000000562188            | 0.000001244501        | 0.000005438303       | 0.003270864370       |
|                    | 0.000000494340            | 0.000000558765            | 0.000001246851        | 0.000005356174       | 0.003213221220       |
|                    | 0.000000491009            | 0.000000572821            | 0.000001243890        | 0.000005270205       | 0.003189432176       |
|                    | 0.000000478685            | 0.000000594062            | 0.000001226162        | 0.000005116854       | 0.003127474618       |
|                    | 0.000000468476            | 0.000000598139            | 0.000001221346        | 0.000005035849       | 0.003044852286       |

|               |               |                |                |                |
|---------------|---------------|----------------|----------------|----------------|
| 0.00000454260 | 0.00000605820 | 0.000001245320 | 0.000005072862 | 0.003033840077 |
| 0.00000451008 | 0.00000599769 | 0.000001217447 | 0.000005073694 | 0.002977421761 |
| 0.00000430525 | 0.00000588701 | 0.000001194026 | 0.000004998494 | 0.002917241535 |
| 0.00000421836 | 0.00000586449 | 0.000001161753 | 0.000004998193 | 0.002926221090 |
| 0.00000420374 | 0.00000582731 | 0.000001158689 | 0.000005053409 | 0.002915674649 |

| <i>Language</i>  | <i>love you_frequency</i> | <i>like you_frequency</i> | <i>kiss_frequency</i> | <i>hug_frequency</i> | <i>individualism</i> |
|------------------|---------------------------|---------------------------|-----------------------|----------------------|----------------------|
| American-English | 0.000004031601            | 0.000006035482            | 0.000009388236        | 0.000000961852       | 0.005291156015       |
|                  | 0.000003965185            | 0.000005940444            | 0.000009281004        | 0.000000960427       | 0.005243421691       |
|                  | 0.000003915615            | 0.000005868753            | 0.000009224458        | 0.000000942905       | 0.005195599154       |
|                  | 0.000003857683            | 0.000005793562            | 0.000009196059        | 0.000000945931       | 0.005148322590       |
|                  | 0.000003792292            | 0.000005681365            | 0.000008955980        | 0.000000937698       | 0.005090650778       |
|                  | 0.000003703397            | 0.000005493305            | 0.000008872625        | 0.000000942984       | 0.005037218419       |
|                  | 0.000003736448            | 0.000005484999            | 0.000009050110        | 0.000000950735       | 0.005074191146       |
|                  | 0.000003788501            | 0.000005563353            | 0.000009078649        | 0.000000960903       | 0.005136822042       |
|                  | 0.000003817703            | 0.000005637989            | 0.000009011279        | 0.000000968190       | 0.005133792516       |
|                  | 0.000003842731            | 0.000005668187            | 0.000008927113        | 0.000000997725       | 0.005149751403       |
|                  | 0.000003906420            | 0.000005760390            | 0.000008759529        | 0.000001027686       | 0.005152624501       |
|                  | 0.000003936228            | 0.000005859323            | 0.000008777689        | 0.000001072920       | 0.005146405294       |
|                  | 0.000004060373            | 0.000006053319            | 0.000008708912        | 0.000001119021       | 0.005121844622       |
|                  | 0.000004143449            | 0.000006260655            | 0.000008412327        | 0.000001186366       | 0.005103853871       |
|                  | 0.000004298556            | 0.000006415395            | 0.000008390414        | 0.000001249141       | 0.005063453576       |
|                  | 0.000004523710            | 0.000006658907            | 0.000008592976        | 0.000001353044       | 0.005101043410       |
|                  | 0.000004751153            | 0.000006975973            | 0.000008740024        | 0.000001457706       | 0.005132987938       |
|                  | 0.000005052106            | 0.000007327545            | 0.000009107827        | 0.000001592314       | 0.005217466496       |
|                  | 0.000005448570            | 0.000007726432            | 0.000009563074        | 0.000001739749       | 0.005303373998       |
|                  | 0.000005728212            | 0.000008110907            | 0.000010021277        | 0.000001885638       | 0.005401769171       |
|                  | 0.000006077443            | 0.000008380943            | 0.000010588489        | 0.000002045662       | 0.005452948127       |
|                  | 0.000006350049            | 0.000008712762            | 0.000011121318        | 0.000002180144       | 0.005487398266       |
|                  | 0.000006665029            | 0.000008989548            | 0.000011554223        | 0.000002331986       | 0.005538623867       |
|                  | 0.000006940190            | 0.000009265672            | 0.000012018680        | 0.000002497114       | 0.005596147232       |
|                  | 0.000007157192            | 0.000009553308            | 0.000012445423        | 0.000002663377       | 0.005662263051       |
|                  | 0.000007297973            | 0.000009762762            | 0.000012849353        | 0.000002801514       | 0.005730777061       |
|                  | 0.000007486150            | 0.000009985250            | 0.000013064749        | 0.000002961700       | 0.005771660057       |
|                  | 0.000007539825            | 0.000010216567            | 0.000013264295        | 0.000003082146       | 0.005821621760       |
|                  | 0.000007693745            | 0.000010526928            | 0.000013605040        | 0.000003273943       | 0.005930398469       |
|                  | 0.000007733789            | 0.000010708960            | 0.000013843476        | 0.000003390251       | 0.005986986140       |
|                  | 0.000007877380            | 0.000010980308            | 0.000014291080        | 0.000003502846       | 0.006049228057       |
|                  | 0.000007989662            | 0.000011222668            | 0.000014635991        | 0.000003624565       | 0.006086444551       |
|                  | 0.000008059034            | 0.000011420545            | 0.000014836822        | 0.000003741150       | 0.006113508361       |
|                  | 0.000008064357            | 0.000011517396            | 0.000015022454        | 0.000003836064       | 0.006159177832       |
|                  | 0.000008168233            | 0.000011713314            | 0.000015211174        | 0.000003972317       | 0.006230281707       |
|                  | 0.000008158815            | 0.000011840849            | 0.000015159687        | 0.000004076080       | 0.006268362414       |
|                  | 0.000008217127            | 0.000012083614            | 0.000015222675        | 0.000004206722       | 0.006359938017       |
|                  | 0.000008442713            | 0.000012554073            | 0.000015492760        | 0.000004458365       | 0.006536113387       |
|                  | 0.000008671935            | 0.000012959147            | 0.000015712092        | 0.000004673532       | 0.006716398747       |
|                  | 0.000009243552            | 0.000013748096            | 0.000016362968        | 0.000005083783       | 0.007010994158       |

|                |                |                |                |                |
|----------------|----------------|----------------|----------------|----------------|
| 0.00009833711  | 0.000014555041 | 0.000017091234 | 0.000005487144 | 0.007300945810 |
| 0.000010520419 | 0.000015377471 | 0.000018114194 | 0.000005853919 | 0.007676908472 |
| 0.000011334383 | 0.000016286507 | 0.000019298269 | 0.000006315981 | 0.008057837670 |
| 0.000012019486 | 0.000016997096 | 0.000020306905 | 0.000006745291 | 0.008380534322 |
| 0.000012633181 | 0.000017601395 | 0.000021251610 | 0.000007045335 | 0.008776965670 |
| 0.000013166687 | 0.000017911411 | 0.000022420895 | 0.000007140890 | 0.009267272847 |
| 0.000013322460 | 0.000018011750 | 0.000022810725 | 0.000007178790 | 0.009428388566 |
| 0.000013576301 | 0.000018174198 | 0.000023400939 | 0.000007222970 | 0.009650539395 |
| 0.000013711496 | 0.000018228061 | 0.000023748200 | 0.000007290071 | 0.009784005443 |
