# Supplementary material for: Culture Change and Affectionate Communication in China and the United States: Evidence From Google Digitized Books 1960–2008
Source: PubMed Central journal article supplement (PMC6540734; doi:10.3389/fpsyg.2019.01110), 2019-05-22
Supplement: Table_1.pdf [file Table_1.pdf]

*Table S1. Beta for Year when controlling for the percentage of fiction books in American Books, 1960-2008.*

|                      | Kiss    | Hug     | Love you | Like you | Verbal affection words | Nonverbal affection words | All affection words |
|----------------------|---------|---------|----------|----------|------------------------|---------------------------|---------------------|
| <i>Beta for Year</i> | 1.04*** | 1.02*** | 1.01***  | 1.02***  | 1.02***                | 1.04***                   | 1.03***             |

*Notes.* Verbal affection words include “love you” and “like you”, and nonverbal affection words include “kiss” and “hug”.
